# Supplementary material
Source: publisher figshare collection journal article supplement (https://frontiersin.figshare.com/ndownloader/files/14119529)
Supplement: Supplementary file [file 14119529]

## *Supplementary Material*

### **IgG Fc glycosylation patterns of preterm infants differ with gestational age**

**Nele Twisselmann<sup>1#\*</sup>, Yannic C. Bartsch<sup>2#</sup>, Julia Pagel<sup>1,3</sup>, Christian Wieg<sup>4</sup>, Annika Hartz<sup>1</sup>, Marc Ehlers<sup>2,5</sup>, Christoph Härtel<sup>1</sup>**

**# contributed equally**

**\* Correspondence:**

Nele Twisselmann

nele.twisselmann@uksh.de

<sup>1</sup>Department of Pediatrics, University of Lübeck and University Medical Center Schleswig-Holstein, Lübeck, Germany;

<sup>2</sup>Laboratories of Immunology and Antibody Glycan Analysis, Institute for Nutrition Medicine, University of Lübeck and University Medical Center Schleswig-Holstein, Lübeck, Germany;

<sup>3</sup>Department of Infectious Diseases and Microbiology, University of Lübeck and University Medical Center Schleswig-Holstein, Lübeck, Germany;

<sup>4</sup>Department of Neonatology; Hospital Aschaffenburg-Alzenau, Aschaffenburg, Germany.

<sup>5</sup>Airway Research Center North (ARCN), German Center for Lung Research (DZL), University of Lübeck, Lübeck, Germany

## Supplementary Tables

**Supplementary table 1: Percentage of the area under the curve (AUC) from nine glycan peaks depicted for all preterm and term infant samples.** The relative proportion of the individual peaks of a sample was calculated by dividing AUC of the individual curve (exemplary histogram in figure 1B) by the AUC of the sum of all nine identified peaks and this multiplied by 100. The glycans of collected fractions containing individual peaks were previously identified by MALDI-TOF analysis (Epp et al. 2018).

| Patient_ID | Gestational age | G0      | G0GNac | G1      | G1GNac | G2      | G2GNac | G1S1   | G2S1    | G2S2   |
|------------|-----------------|---------|--------|---------|--------|---------|--------|--------|---------|--------|
| 651        | 23,6            | 30,6221 | 1,1044 | 38,3405 | 3,6019 | 17,0731 | 0,9694 | 1,1238 | 7,1648  | 0,0000 |
| 673        | 23,6            | 20,1618 | 0,8298 | 37,3384 | 4,0724 | 23,3362 | 1,6397 | 1,6415 | 10,9802 | 0,0000 |
| 365        | 23,7            | 6,9706  | 0,8730 | 26,6587 | 5,8128 | 38,0220 | 3,3799 | 0,7678 | 17,5151 | 0,0000 |
| 689        | 24              | 26,3610 | 0,6715 | 40,0843 | 3,0808 | 19,9354 | 1,2233 | 1,3592 | 7,2846  | 0,0000 |
| 172        | 24,1            | 15,3478 | 2,2273 | 35,3795 | 6,3509 | 25,6753 | 1,8330 | 1,1969 | 11,9892 | 0,0000 |
| 521        | 24,3            | 21,1797 | 3,3365 | 35,6107 | 5,8032 | 22,8429 | 1,9529 | 1,2376 | 8,0365  | 0,0000 |
| 159        | 24,6            | 12,0803 | 0,0000 | 35,2931 | 3,9524 | 31,3950 | 2,1271 | 1,3708 | 13,7813 | 0,0000 |
| 154        | 24,7            | 19,0520 | 1,0592 | 35,9492 | 4,5450 | 25,7499 | 1,5710 | 1,4596 | 10,6140 | 0,0000 |
| 322        | 25              | 13,3495 | 0,8592 | 33,5178 | 4,6695 | 29,3536 | 1,9132 | 1,5177 | 14,8195 | 0,0000 |
| 623        | 25              | 9,8715  | 0,6827 | 31,2260 | 5,8968 | 33,8882 | 3,4824 | 0,8959 | 14,0564 | 0,0000 |
| 1032       | 25              | 24,6063 | 4,1935 | 32,6794 | 5,6246 | 20,4001 | 1,2140 | 1,4134 | 9,8687  | n.a.   |
| 665        | 25,3            | 12,2615 | 0,6816 | 32,0762 | 6,7780 | 28,7382 | 2,6803 | 1,5696 | 15,2146 | 0,0000 |
| 572        | 25,4            | 11,7000 | 0,3831 | 34,4861 | 3,3996 | 32,1853 | 2,2081 | 1,3777 | 14,2602 | 0,0000 |
| 198        | 25,7            | 11,0327 | 0,4348 | 31,9212 | 4,0985 | 29,9808 | 2,1238 | 1,7493 | 18,6591 | 0,0000 |
| 268        | 25,8            | 16,1964 | 0,6872 | 35,2694 | 4,0212 | 28,9880 | 1,8976 | 1,2370 | 11,7031 | 0,0000 |
| 539        | 25,9            | 12,4830 | 0,6117 | 30,9028 | 4,0976 | 33,0116 | 2,2664 | 1,0551 | 15,5719 | 0,0000 |
| 539        | 25,9            | 12,4257 | 1,5643 | 31,1302 | 5,7644 | 32,6552 | 2,7889 | 0,8056 | 12,8657 | 0,0000 |
| 539        | 25,9            | 12,4267 | 0,6056 | 31,7467 | 3,6589 | 34,6157 | 2,2665 | 0,7869 | 13,8930 | 0,0000 |
| 685        | 25,9            | 7,9497  | 0,2340 | 30,8756 | 3,4547 | 37,1603 | 2,2221 | 0,8883 | 17,2153 | 0,0000 |
| 315        | 26              | 31,2238 | 4,5697 | 37,6811 | 5,7480 | 13,4142 | 0,8206 | 1,4698 | 5,0728  | n.a.   |

| Patient_ID | Gestational age | G0      | G0GNAc | G1      | G1GNAc | G2      | G2GNAc | G1S1   | G2S1    | G2S2   |
|------------|-----------------|---------|--------|---------|--------|---------|--------|--------|---------|--------|
| 681        | 26,1            | 12,7609 | 1,0932 | 33,9190 | 5,6428 | 31,1486 | 2,4118 | 0,9621 | 12,0618 | 0,0000 |
| 143        | 26,3            | 11,0030 | 0,0000 | 31,8790 | 5,2367 | 31,3986 | 2,7514 | 1,3923 | 16,3391 | 0,0000 |
| 144        | 26,3            | 16,1120 | 1,3168 | 36,0616 | 4,9719 | 26,3398 | 2,6365 | 1,1360 | 11,4256 | 0,0000 |
| 208        | 26,3            | 9,8520  | 0,5284 | 31,2328 | 5,6896 | 32,9986 | 3,2324 | 1,2822 | 15,1839 | 0,0000 |
| 212        | 26,3            | 12,2165 | 1,9612 | 30,5839 | 6,5875 | 28,3389 | 2,5831 | 1,3092 | 16,4197 | 0,0000 |
| 637        | 26,3            | 12,3577 | 2,0119 | 34,8820 | 6,6335 | 27,8819 | 2,3298 | 1,1641 | 12,7391 | 0,0000 |
| 711        | 26,3            | 11,4181 | 0,5888 | 31,4977 | 4,6136 | 36,6179 | 2,5807 | 0,7592 | 11,9241 | 0,0000 |
| 746        | 26,6            | 16,9334 | 1,0428 | 36,7732 | 5,0757 | 27,3320 | 1,8416 | 0,9334 | 10,0680 | 0,0000 |
| 568        | 26,7            | 6,9071  | 0,4487 | 29,0315 | 3,7248 | 37,6797 | 2,4498 | 0,8756 | 18,8828 | 0,0000 |
| 773        | 26,7            | 12,1646 | 0,5701 | 37,0014 | 4,0454 | 28,3597 | 1,9657 | 1,5986 | 14,2945 | 0,0000 |
| 775        | 26,7            | 13,0713 | 0,8908 | 37,6879 | 5,2059 | 25,5009 | 1,9608 | 1,6260 | 14,0565 | 0,0000 |
| 176        | 27              | 15,2436 | 0,0000 | 35,9547 | 3,5644 | 29,9188 | 1,7065 | 1,4520 | 12,1600 | 0,0000 |
| 137        | 27,3            | 7,4826  | 0,8443 | 28,4960 | 5,5422 | 37,6854 | 2,5356 | 0,7983 | 16,6155 | 0,0000 |
| 179        | 27,3            | 8,3004  | 2,8490 | 25,0820 | 9,2879 | 29,2730 | 3,5617 | 1,9636 | 19,4456 | 0,2369 |
| 296        | 27,4            | 7,5771  | 1,1757 | 28,1777 | 5,1469 | 35,0436 | 3,7702 | 1,1311 | 17,9776 | 0,0000 |
| 297        | 27,4            | 15,0309 | 0,4318 | 36,1268 | 4,8237 | 28,8716 | 2,1837 | 0,0000 | 12,5317 | 0,0000 |
| 346        | 27,4            | 13,1503 | 0,4890 | 35,9422 | 4,5917 | 28,4580 | 2,1368 | 1,3876 | 13,8444 | 0,0000 |
| 544        | 27,4            | 14,3138 | 1,1778 | 36,8754 | 5,6711 | 28,8922 | 2,5572 | 1,0864 | 9,4261  | 0,0000 |
| 560        | 27,4            | 18,1697 | 1,3213 | 37,2286 | 5,4005 | 25,2190 | 1,7681 | 1,2044 | 9,6884  | 0,0000 |
| 657        | 27,4            | 11,9389 | 0,0000 | 35,9920 | 6,8031 | 27,7723 | 4,2442 | 1,1106 | 12,1390 | 0,0000 |
| 677        | 27,4            | 12,8624 | 0,0000 | 34,0721 | 3,9483 | 32,1894 | 2,3689 | 1,3285 | 13,2304 | 0,0000 |
| 709        | 27,4            | 15,7314 | 1,6120 | 34,4890 | 6,4152 | 25,9063 | 2,0748 | 1,3891 | 12,3823 | 0,0000 |
| 761        | 27,4            | 9,4171  | 1,3495 | 29,5700 | 4,6523 | 34,4594 | 2,2510 | 1,3557 | 16,9451 | 0,0000 |
| 390        | 27,7            | 15,1519 | 1,5435 | 30,5247 | 5,4021 | 29,5497 | 2,4214 | 1,1862 | 14,2204 | 0,0000 |
| 668        | 27,9            | 18,1537 | 1,1723 | 34,9646 | 5,3406 | 25,5963 | 1,9693 | 1,2403 | 11,5628 | 0,0000 |
| 138        | 28              | 8,1936  | 0,0000 | 31,6335 | 5,6720 | 31,3693 | 2,9276 | 1,3905 | 18,8135 | 0,0000 |
| 139        | 28              | 10,2218 | 0,6717 | 36,1659 | 5,4751 | 30,3183 | 2,3754 | 0,9297 | 13,8421 | 0,0000 |

| Patient<br>_ID | Gestational<br>age | G0      | G0GNAc | G1      | G1GNAc | G2      | G2GNAc | G1S1   | G2S1    | G2S2   |
|----------------|--------------------|---------|--------|---------|--------|---------|--------|--------|---------|--------|
| 139            | 28                 | 7,4154  | 0,3067 | 31,3608 | 4,0743 | 34,2215 | 2,4018 | 1,2190 | 18,7652 | 0,2355 |
| 531            | 28                 | 9,5997  | 0,6462 | 32,8104 | 5,3209 | 31,5994 | 2,3738 | 1,1532 | 16,3159 | 0,1805 |
| 579            | 28                 | 13,2376 | 0,3898 | 37,8412 | 3,0506 | 30,7416 | 1,8152 | 1,0012 | 11,9228 | 0,0000 |
| 1006           | 28                 | 22,8640 | 3,6596 | 32,8589 | 5,9555 | 19,7596 | 1,4152 | 1,9860 | 11,3951 | 0,1061 |
| 559            | 28,1               | 13,4138 | 1,4089 | 36,2228 | 5,4110 | 25,9196 | 2,2044 | 1,5296 | 13,8899 | 0,0000 |
| 652            | 28,1               | 13,5192 | 0,4208 | 33,3197 | 3,1032 | 32,5914 | 2,0030 | 1,0506 | 13,9921 | 0,0000 |
| 122            | 28,3               | 12,4193 | 1,7728 | 31,8477 | 5,1326 | 28,8022 | 2,3159 | 1,2361 | 16,4733 | 0,0000 |
| 129            | 28,3               | 12,1409 | 0,0000 | 31,5346 | 6,0419 | 35,6439 | 3,0823 | 0,7104 | 10,8460 | 0,0000 |
| 130            | 28,3               | 12,9807 | 2,5083 | 30,9664 | 7,4463 | 31,3135 | 3,4962 | 0,8326 | 10,4560 | 0,0000 |
| 538            | 28,4               | 11,5169 | 0,0000 | 34,1373 | 3,7593 | 30,4326 | 2,4785 | 1,4867 | 16,1888 | 0,0000 |
| 764            | 28,4               | 13,1491 | 0,4862 | 34,4174 | 5,1478 | 27,9885 | 2,6065 | 1,2481 | 14,9563 | 0,0000 |
| 376            | 28,6               | 6,9216  | 1,1595 | 26,5535 | 5,5972 | 37,7367 | 3,6971 | 1,0411 | 17,2934 | 0,0000 |
| 388            | 28,6               | 9,2182  | 0,0000 | 33,5274 | 3,6978 | 33,7701 | 2,1910 | 1,2763 | 16,3192 | 0,0000 |
| 380            | 28,7               | 11,0221 | 1,6622 | 33,0349 | 6,3151 | 30,8394 | 2,5342 | 1,2393 | 13,3528 | 0,0000 |
| 609            | 28,7               | 3,5115  | 0,1085 | 25,9326 | 4,0949 | 49,0233 | 3,1907 | 0,5156 | 13,6229 | 0,0000 |
| 627            | 29,1               | 12,0250 | 1,7684 | 30,3741 | 5,7944 | 29,0581 | 3,3383 | 1,7214 | 15,9204 | 0,0000 |
| 1027           | 29,1               | 14,8123 | 2,2908 | 35,4309 | 7,2775 | 26,3856 | 1,8211 | 0,9719 | 10,9362 | 0,0736 |
| 308            | 29,3               | 8,0406  | 1,1787 | 30,0099 | 7,0616 | 33,0908 | 4,3597 | 1,6405 | 14,6182 | 0,0000 |
| 383            | 29,3               | 5,3774  | 1,1619 | 24,3480 | 5,2731 | 36,1040 | 3,2392 | 1,5189 | 22,9776 | 0,0000 |
| 136            | 29,4               | 8,2696  | 1,5915 | 30,2240 | 4,8340 | 32,2118 | 2,8707 | 1,7321 | 18,2663 | 0,0000 |
| 328            | 29,4               | 5,8552  | 1,6259 | 28,4899 | 7,5012 | 35,3550 | 3,7127 | 1,1297 | 16,3303 | 0,0000 |
| 723            | 29,7               | 6,0205  | 1,5254 | 27,6370 | 7,1758 | 34,5833 | 3,4064 | 1,5757 | 18,0758 | 0,0000 |
| 279            | 29,8               | 9,2844  | 1,6753 | 28,3499 | 7,4061 | 33,0415 | 3,0719 | 1,0557 | 16,1152 | 0,0000 |
| 392            | 29,9               | 8,9222  | 2,5499 | 25,8306 | 6,8359 | 30,5292 | 3,0424 | 1,7215 | 20,5684 | 0,0000 |
| 1017           | 29,9               | 18,1159 | 3,1296 | 35,0509 | 7,6554 | 21,4387 | 1,8476 | 1,7342 | 10,8595 | 0,1683 |
| 700            | 30                 | 5,2993  | 0,5757 | 25,0836 | 3,8111 | 38,0028 | 2,3231 | 1,3857 | 23,5186 | 0,0000 |
| 1000           | 30                 | 7,5561  | 1,5124 | 26,3547 | 6,4193 | 30,9872 | 2,5525 | 1,8112 | 22,6044 | 0,2021 |

| Patient<br>_ID | Gestational<br>age | G0      | G0GNAc | G1      | G1GNAc  | G2      | G2GNAc | G1S1   | G2S1    | G2S2   |
|----------------|--------------------|---------|--------|---------|---------|---------|--------|--------|---------|--------|
| 317            | 30,1               | 7,5327  | 2,1513 | 25,6623 | 7,8611  | 27,0325 | 2,8993 | 2,6723 | 23,9204 | 0,2680 |
| 664            | 30,3               | 7,8945  | 1,7939 | 29,5093 | 6,4037  | 32,6202 | 2,5190 | 1,3027 | 17,9567 | 0,0000 |
| 1010           | 30,6               | 11,3753 | 2,4296 | 28,0669 | 6,5109  | 27,9697 | 2,2345 | 1,9209 | 19,2414 | 0,2509 |
| 326            | 30,9               | 7,1014  | 1,6921 | 29,2202 | 7,6635  | 28,8034 | 2,9585 | 2,5300 | 20,0310 | 0,0000 |
| 757            | 30,9               | 5,7839  | 1,2180 | 24,5996 | 8,6257  | 32,1782 | 5,5265 | 1,1448 | 20,6587 | 0,2647 |
| 522            | 31                 | 4,4077  | 1,3664 | 22,0690 | 6,6785  | 38,4798 | 4,9006 | 0,9324 | 21,1656 | 0,0000 |
| 710            | 31                 | 17,0288 | 4,2507 | 29,9641 | 7,4517  | 25,0363 | 2,3373 | 1,4741 | 12,4570 | 0,0000 |
| 1042           | 31,4               | 15,2833 | 2,7856 | 33,3304 | 7,0237  | 24,6824 | 1,8413 | 1,4870 | 13,5663 | n.a.   |
| 284            | 31,7               | 6,5853  | 1,0124 | 29,1126 | 8,5192  | 36,1126 | 4,2190 | 1,0028 | 13,4360 | 0,0000 |
| 285            | 31,7               | 5,9214  | 1,3612 | 28,3809 | 6,8156  | 36,7128 | 2,7838 | 1,2785 | 16,7459 | 0,0000 |
| 377            | 32,1               | 6,6111  | 1,6151 | 27,3095 | 8,1730  | 33,9475 | 4,5133 | 1,3260 | 16,5046 | 0,0000 |
| 537            | 32,7               | 9,1509  | 1,9168 | 29,4510 | 10,7455 | 30,2423 | 4,9761 | 0,9098 | 12,6076 | 0,0000 |
| 1007           | 32,9               | 11,3653 | 2,4195 | 34,1317 | 7,4522  | 26,6188 | 1,7177 | 1,8209 | 14,4739 | n.a.   |
| 1003           | 33,3               | 20,9032 | 4,8865 | 31,7016 | 7,8611  | 17,2283 | 1,5826 | 2,3094 | 13,3147 | 0,2127 |
| 338            | 33,6               | 2,6173  | 0,6351 | 18,2999 | 5,9753  | 36,3795 | 3,5861 | 1,9529 | 29,7516 | 0,8024 |
| 598            | 37,1               | 8,2573  | 0,8072 | 32,1713 | 6,6370  | 32,5476 | 3,0129 | 1,0493 | 15,4226 | 0,0947 |
| 812            | 38,1               | 15,8482 | 3,3646 | 33,1935 | 7,2340  | 24,0777 | 1,8695 | 1,4031 | 12,9106 | 0,0989 |
| 1067           | 38,4               | 5,1428  | 1,0324 | 23,9195 | 5,7742  | 38,7058 | 2,7708 | 1,1861 | 21,4684 | n.a.   |
| 831            | 38,6               | 7,5240  | 1,6713 | 28,8620 | 6,5747  | 34,8560 | 2,6572 | 1,2896 | 16,5652 | n.a.   |
| 594            | 38,7               | 6,6906  | 0,3061 | 30,2170 | 4,0351  | 40,3901 | 2,7349 | 0,9527 | 14,6735 | 0,0000 |
| 1074           | 39,6               | 9,4311  | 2,0816 | 27,4737 | 6,6816  | 28,3093 | 2,7906 | 2,6096 | 20,3040 | 0,3184 |
| 760            | 39,7               | 7,1790  | 1,4055 | 26,4966 | 7,0497  | 37,5702 | 3,2257 | 0,9934 | 15,9700 | 0,1101 |
| 292            | 40                 | 5,6051  | 1,0324 | 24,3352 | 5,3106  | 34,8446 | 3,1739 | 1,5011 | 23,9168 | 0,2803 |
| 589            | 40                 | 8,9361  | 0,0000 | 29,3656 | 3,1563  | 36,3508 | 2,5650 | 1,1704 | 18,2513 | 0,2045 |
| 590            | 40                 | 11,4902 | 1,4566 | 32,7423 | 7,0944  | 29,3839 | 2,8453 | 1,2660 | 13,7214 | 0,0000 |
| 592            | 40                 | 11,3147 | 0,6460 | 36,1078 | 4,7181  | 29,1390 | 2,0271 | 1,6405 | 14,4068 | 0,0000 |
| 593            | 40                 | 8,9837  | 0,2075 | 36,6580 | 2,7493  | 34,8731 | 2,0141 | 1,1898 | 13,3245 | 0,0000 |

| <b>Patient<br/>_ID</b> | <b>Gestational<br/>age</b> | <b>G0</b> | <b>G0GNAc</b> | <b>G1</b> | <b>G1GNAc</b> | <b>G2</b> | <b>G2GNAc</b> | <b>G1S1</b> | <b>G2S1</b> | <b>G2S2</b> |
|------------------------|----------------------------|-----------|---------------|-----------|---------------|-----------|---------------|-------------|-------------|-------------|
| 378                    | 40,1                       | 10,4143   | 1,1084        | 31,3964   | 6,9350        | 29,2294   | 2,7573        | 1,1957      | 16,9635     | 0,0000      |
| 1068                   | 41,4                       | 9,4790    | 2,4137        | 26,5886   | 7,3892        | 32,5016   | 2,9751        | 1,3911      | 17,1033     | 0,1583      |
| 587                    | 42                         | 10,2122   | 2,0360        | 32,6663   | 7,6482        | 30,9810   | 2,8750        | 1,1741      | 12,4073     | 0,0000      |

**Supplementary table 2: Percentage of the area under the curve (AUC) from nine glycan peaks depicted for all mother samples.** The relative proportion of the individual peaks of a sample was calculated by dividing AUC of the individual curve (exemplary histogram in figure 1B) by the AUC of the sum of all nine identified peaks and this multiplied by 100. The glycans of collected fractions containing individual peaks were previously identified by MALDI-TOF analysis (Epp et al. 2018).

| Mother_ID | Gestational age | G0      | G0GNac | G1      | G1GNac | G2      | G2GNac | G1S1   | G2S1    | G2S2   |
|-----------|-----------------|---------|--------|---------|--------|---------|--------|--------|---------|--------|
| 34        | 23,4            | 20,9544 | 3,1804 | 33,4141 | 5,2085 | 22,1025 | 1,2839 | 1,7481 | 11,9961 | 0,1120 |
| 189       | 23,6            | 13,0408 | 4,0145 | 30,4036 | 7,1428 | 26,6563 | 2,6784 | 1,8755 | 13,8969 | 0,2913 |
| 156       | 23,7            | 5,9209  | 1,7900 | 23,1879 | 6,4823 | 36,8893 | 3,1132 | 1,2590 | 21,0175 | 0,3399 |
| 30        | 24,7            | 15,0316 | 3,6290 | 32,6835 | 7,3946 | 27,3650 | 2,2315 | 1,2022 | 10,3834 | 0,0793 |
| 67        | 24,7            | 6,8006  | 0,4986 | 29,9517 | 3,1510 | 40,4102 | 1,6409 | 1,5324 | 16,0148 | 0,0000 |
| 28        | 25              | 11,2816 | 2,6597 | 30,5775 | 7,3761 | 30,7732 | 2,7472 | 1,5781 | 12,7482 | 0,2583 |
| 167       | 25,3            | 14,0263 | 1,8816 | 32,1269 | 4,7818 | 27,7455 | 1,7401 | 1,8688 | 15,6753 | 0,1537 |
| 176       | 25,4            | 6,1310  | 1,3827 | 29,0995 | 6,5217 | 33,3332 | 4,8706 | 2,0763 | 16,5850 | 0,0000 |
| 76        | 26              | 19,1917 | 2,0835 | 35,2556 | 4,3761 | 22,9994 | 1,2924 | 2,4816 | 12,1604 | 0,1593 |
| 149       | 26,3            | 9,1825  | 2,2849 | 29,8912 | 7,5686 | 31,9655 | 3,0499 | 1,7207 | 14,3367 | 0,0000 |
| 152       | 27,3            | 9,4054  | 3,0515 | 24,1919 | 7,9558 | 29,6040 | 3,6051 | 2,6981 | 19,2536 | 0,2346 |
| 155       | 27,4            | 22,2768 | 0,4347 | 39,1116 | 2,7179 | 22,6120 | 1,1947 | 1,8996 | 9,7527  | 0,0000 |
| 174       | 27,4            | 16,9648 | 0,8927 | 37,3807 | 5,1502 | 27,5392 | 1,8365 | 1,4937 | 8,7422  | 0,0000 |
| 177       | 27,4            | 24,8637 | 1,8566 | 40,5431 | 5,5686 | 17,6970 | 1,3141 | 1,9315 | 6,2254  | 0,0000 |
| 179       | 27,9            | 9,5503  | 2,1156 | 26,9942 | 6,2615 | 31,7942 | 2,6814 | 1,3294 | 19,0777 | 0,1957 |
| 187       | 27,9            | 12,0612 | 2,8848 | 32,4880 | 7,2195 | 26,6699 | 2,2381 | 1,7534 | 14,5405 | 0,1445 |
| 171       | 28              | 17,1914 | 1,2290 | 35,3828 | 5,6962 | 24,2205 | 1,7880 | 1,5986 | 12,8936 | 0,0000 |
| 186       | 28,1            | 14,7911 | 0,8416 | 29,6452 | 5,2610 | 28,7386 | 2,6061 | 1,6748 | 16,2849 | 0,1567 |
| 172       | 28,4            | 13,8071 | 0,4377 | 36,3962 | 4,1486 | 28,1918 | 1,7704 | 1,2405 | 14,0078 | 0,0000 |
| 493       | 28,4            | 15,7590 | 3,1649 | 32,6924 | 6,6108 | 28,1573 | 2,3362 | 1,3320 | 9,8518  | 0,0955 |
| 164       | 28,6            | 9,3420  | 0,3261 | 30,4486 | 3,2347 | 32,5352 | 2,0761 | 1,9963 | 19,6744 | 0,3667 |
| 24        | 29,1            | 11,4673 | 2,5609 | 28,7140 | 6,9524 | 30,3597 | 2,8960 | 1,6838 | 15,2517 | 0,1141 |
| 487       | 29,4            | 17,8215 | 2,0581 | 30,4296 | 4,4780 | 24,7148 | 1,6539 | 2,7813 | 15,8364 | 0,2264 |
| 72        | 30,1            | 14,5264 | 1,8598 | 33,9359 | 4,8942 | 25,5464 | 1,5917 | 2,4770 | 14,9490 | 0,2195 |

| <b>Mother<br/>_ID</b> | <b>Gestational<br/>age</b> | <b>G0</b> | <b>G0GNAc</b> | <b>G1</b> | <b>G1GNAc</b> | <b>G2</b> | <b>G2GNAc</b> | <b>G1S1</b> | <b>G2S1</b> | <b>G2S2</b> |
|-----------------------|----------------------------|-----------|---------------|-----------|---------------|-----------|---------------|-------------|-------------|-------------|
| 90                    | 30,4                       | 14,1439   | 2,4586        | 30,7072   | 6,5830        | 24,7015   | 2,3141        | 1,9004      | 16,9546     | 0,2367      |
| 185                   | 30,7                       | 19,9562   | 3,8369        | 33,1996   | 6,9472        | 21,3651   | 1,9910        | 1,7937      | 10,7996     | 0,1107      |
| 140                   | 30,9                       | 18,1413   | 2,7035        | 35,0483   | 5,6302        | 25,9804   | 1,6007        | 1,2606      | 9,5360      | 0,0990      |
| 169                   | 31                         | 7,6520    | 1,1388        | 25,7948   | 4,3959        | 37,6230   | 1,9134        | 1,1878      | 20,2943     | 0,0000      |
| 472                   | 31                         | 24,2976   | 2,6064        | 31,5221   | 4,0415        | 22,8820   | 1,2376        | 1,6620      | 11,5028     | 0,2480      |
| 154                   | 31,1                       | 12,6034   | 1,7720        | 32,3362   | 4,8577        | 31,5676   | 1,8824        | 1,2959      | 13,5907     | 0,0942      |
| 154                   | 31,1                       | 15,0138   | 2,1896        | 36,5747   | 6,1990        | 30,5567   | 1,6139        | 0,5241      | 7,3283      | n.a.        |
| 68                    | 31,9                       | 10,2638   | 2,0541        | 29,7526   | 6,1680        | 29,1168   | 2,6274        | 2,2096      | 17,6211     | 0,1865      |
| 473                   | 31,9                       | 22,0277   | 2,8205        | 32,8062   | 5,3152        | 20,5023   | 1,7693        | 2,5913      | 11,9979     | 0,1695      |
| 181                   | 32                         | 12,9244   | 2,4666        | 29,3075   | 5,7772        | 30,7200   | 2,4939        | 1,7873      | 14,4037     | 0,1194      |
| 160                   | 32,1                       | 13,6270   | 0,9261        | 33,1679   | 5,7265        | 29,4537   | 2,6214        | 1,5974      | 12,8800     | 0,0000      |
| 110                   | 33,3                       | 8,6302    | 1,6906        | 24,7450   | 5,5461        | 29,9082   | 2,8762        | 2,5070      | 23,7464     | 0,3504      |
| 82                    | 33,4                       | 22,1171   | 3,5965        | 34,1180   | 5,7630        | 22,7985   | 1,8035        | 1,2809      | 8,4449      | 0,0778      |
| 112                   | 33,9                       | 11,5311   | 2,4165        | 30,1442   | 7,1284        | 33,2062   | 2,6589        | 1,0328      | 11,7903     | 0,0916      |
| 64                    | 34                         | 21,4714   | 3,0341        | 33,3579   | 5,8047        | 19,5325   | 1,4964        | 2,2893      | 12,8020     | 0,2119      |
| 147                   | 34,3                       | 28,2794   | 3,2446        | 36,8354   | 4,9742        | 16,4106   | 1,1455        | 1,7465      | 7,2985      | 0,0654      |
| 184                   | 34,3                       | 8,6988    | 2,2118        | 25,1910   | 6,3581        | 37,2987   | 2,8061        | 0,8720      | 16,4034     | 0,1601      |
| 190                   | 34,6                       | 24,3846   | 2,8265        | 35,5160   | 5,1717        | 17,9384   | 1,4344        | 2,8284      | 9,7554      | 0,1446      |
